# Supplementary material
Source: PubMed Central journal article supplement (PMC3938151)
Supplement: supp_blood-2013-11-539353_blood-2013-11-539353-1.pdf [file supp_blood-2013-11-539353_blood-2013-11-539353-1.pdf]

## 1 SUPPLEMENTAL METHODS

2

### 3 Detailed methodology for experimental procedures

4

#### 5 *Exchange transfusion of 7- and 42- day old stored blood*

6 Commercially available canine universal donor (DEA1.1, ABRINT, Dixon, CA),  
7 leukoreduced, red blood cells stored at 2-6 °C for either 7 or 42 days were used to perform  
8 the four exchange-transfusions at 4, 7, 10 and 13 h as previously described <sup>1</sup>. Briefly, each  
9 dog had 25% of total blood volume (20 ml/kg) removed via a femoral arterial catheter and  
10 replaced within 30 minutes with an equivalent volume of stored red blood cells (10 ml/kg)  
11 at room temperature followed by thawed fresh frozen canine universal donor plasma (10  
12 ml/kg) at 37°C, both infused through the side arm of a catheter introducer placed in the  
13 external jugular vein. All red blood cells and plasma units were cultured to detect  
14 contamination within 5 minutes of opening prior to transfusion. This procedure was  
15 repeated every 3 h for a total of 4 exchange transfusions over 12 h, resulting in a total blood  
16 volume replaced of 80 ml/kg (reaching an equivalent of 68% total volume exchange when  
17 accounting for mixing). This exchange transfusion was performed 4 to 16 h after bacterial  
18 challenge.

19

#### 20 *Blood cell washing*

21 RBC units were washed using the Food and Drug Administration-licensed Haemonetics  
22 ACP215 automated cell processing system (Braintree, MA). The process of cell washing  
23 introduces a unit of RBC (approximately 200-300 cc) into a centrifuge and adds isotonic  
24 0.9% saline and 2% dextrose to the spinning RBCunit (1-2 liters depending on the volume

1 of the RBC unit). A disposable closed system circuit is used to ensure an aseptic procedure  
2 (RBC De-Glycerol Set 325 mL BMB Ref.236, Haemonetics Corporation, Braintree, MA).  
3 Briefly, the programmable instrument separates the RBC into a sterile container while  
4 discarding supernatant plasma and wash solution. On completion, the washed RBCs are  
5 transferred to the final container for storage or transfusion. Blood was stored in a CP2D  
6 anticoagulant and AS-3 nutrient solution, an FDA-licensed anticoagulant preservative  
7 solution for human red cells.

8

### 9 *Statistical methods*

10 Survival times were analyzed using stratified Cox proportional hazard model to  
11 account for potential cycle effect. Linear mixed models (SAS PROC Mixed) were used for  
12 the analysis of continuous variables to account for repeated measurements of each animal  
13 and the actual pairing of animals within each cycle. To evaluate shock reversal, we  
14 standardized MAP and NE using Z-scores and then calculated a “shock reversal” score  
15 (higher score indicates improvement in shock reversal) based on the difference of the MAP  
16 Z-score and NE Z-score, as done previously<sup>1</sup>. To evaluate pulmonary function, we  
17 constructed a “lung injury” score (lower score is better) based on the first principal  
18 component of mPAP, arterial alveolar oxygen gradient, plateau pressures, breathing rates,  
19 and oxygen saturation, as done previously<sup>1</sup>. Standard residual diagnostics were used to  
20 check model assumptions. Logarithm-transformation was used when necessary. SAS  
21 version 9.3 (Cary, NC) was used for all analyses. All p-values are two-tailed and  
22 considered significant if  $p \leq 0.05$ .

23

### 24 *Physiological and laboratory measurements*

1 Hemodynamic parameters [MAP, mPAP, PAOP, central venous pressure (CVP), heart rate  
2 (HR)] were measured at 0, 2, 4, 7, 10, 13, 16 h and q2 h thereafter. Echocardiography was  
3 performed at 0, 4, 24, 48, 72, 96 h. Cardiac output (CO) and blood sampling from the  
4 animals [arterial and mixed venous blood gases, complete blood counts (CBC), and serum  
5 chemistries] were measured in all animals at 0, 4, 7, 10, 13, 16, 24 h and q 24 thereafter.  
6 Plasma cell-free hemoglobin (CFH), and haptoglobin were measured at 0 h, 10 h, 24 and 48  
7 h. Plasma was collected to measure iron levels [non-transferrin bound iron (NTBI) and  
8 plasma labile iron (PLI), and transferrin-bound iron (TBI) at 4 h, 13 h, 24 h and 48 h.  
9 Sampling of the blood storage bags kept refrigerated for 7 or 42 days was performed at 4  
10 and 10 h for potential bacterial contamination. Just prior to transfusion and q 24 h starting  
11 at 0 h; blood cultures, sputum cultures and urine volumes were sampled.

12

### 13 *Mechanical Ventilation, Fluid and Vasopressor Support*

14 Fractional inspired oxygen concentration (FiO<sub>2</sub>), respiratory rate (RR), and positive end  
15 expiratory pressure (PEEP) levels were titrated based on algorithms incorporating  
16 scheduled SaO<sub>2</sub>, and arterial blood gas measures as previously described<sup>1, 25</sup>. All animals  
17 received continuous maintenance fluids (Normasol-M + 27 mEq K<sup>+</sup>/L, 2 mL/kg/h, IV)  
18 beginning at T<sub>0</sub>. To simulate clinical hemodynamic support and equalize initial volume  
19 status in all animals, up to three fluid boluses (0.9 % NaCl, 20mL/kg) were administered at  
20 20 min intervals if PAOP measured at 4 h was < 10 mmHg. At 1 h the MAP was still < 80  
21 mmHg after the three fluid boluses, a NE infusion was initiated at 0.2 µg/kg/min rate and  
22 adjusted incrementally (0.2 to 0.4 to 1.0, to a maximum of 2.0 µg/kg/min) at 5-min  
23 intervals to maintain MAP between 80 and 110 mmHg throughout the 96 h study. At

1 subsequent times (T6, T8, T10, T12, and every 4 hours thereafter), up to 3 IV fluid boluses  
2 (20 mL/kg) were administered if PAOP < 10 mmHg.

3

#### 4 *Sedation and analgesia management*

5 All animals were monitored by a clinician or trained technician at the bedside throughout  
6 the study. Midazolam (0.2 mg/kg loading dose, 50 µg/kg/min infusion IV) sedation and  
7 fentanyl (5 µg/kg loading dose, 0.7 µg/kg/min IV infusion) analgesia were titrated based on  
8 an algorithm as previously described<sup>1,25</sup>. Medetomidine infusion (2-5 mg/kg/min) was  
9 used to supplement sedation as needed according to set criteria.

10

#### 11 *Canine plasma Cell-free Hemoglobin (CFH), Haptoglobin, Transferring-bound Iron (TBI)* 12 *and Plasma Labile Iron (PLI) Assays*

13 Hb concentrations (µmol/L) in plasma or supernatant collected from stored RBC units were  
14 determined by Drabkin's method as previously described<sup>1</sup>. Canine haptoglobin levels were  
15 determined using a commercial canine Hp ELISA kit (Abnova, Taipei City, Taiwan).  
16 Canine NTBI and PLI were determined by commercial company using a proprietary assay  
17 (aFerrix, Tel Aviv, Israel). TBI was measured using a spectrometer and measuring  
18 transferrin electron paramagnetic resonance spectra as previously described<sup>1</sup>.

19

20

## 1 **Supplemental Figures Legends**

### 2 ***Supplemental Figure 1. Serial mean $\pm$ SE values of lung injury score (LIS) components.***

3 This figure uses the same format as Figure 2, except now respiratory rate (panels A and F),  
4 alveolar-arterial oxygen gradient (panels B and G), plateau pressure (panels C and H),  
5 SpO<sub>2</sub> (panels D and I) or oxygen saturation (panels E and J) are plotted on the y-axis.

### 6 ***Supplemental Figure 2. Mean ( $\pm$ SE) artery pressure and norepinephrine dose at serial***

7 ***timepoints.*** This figure uses the same format as Figure 2, except now mean artery pressure  
8 (panels A and C) or norepinephrine rate (panels B and C) are plotted on the y-axis.

### 9 ***Supplemental Figure 3. Mean ( $\pm$ SE) levels of Alanine Aminotransferase (ALT) and***

10 ***Total Bilirubin at serial time points.*** The format is similar to Figure 2, except now levels  
11 of ALT and Total Bilirubin are plotted on the y-axis of panels A and B. P-values are  
12 denoted by asterisks and explained below the figures.

13

14

1 **Supplemental Tables Legends**

2 ***Supplemental Table 1. Laboratory parameters at 0h and 4h after S. aureus challenge***

3 ***(immediately before transfusion)***. Means and standard errors of blood chemistry, cellular

4 blood counts and proteins are shown for blood group at 0h (Table A) or 4h (Table B).

5 ***Supplemental Table 2. Laboratory parameters at 24h and 48h after S. aureus challenge.***

6 Means and standard errors of blood chemistry, cellular blood counts and proteins are shown

7 for blood group at 24h (Table A) or 48h (Table B).

8

**42 day old stored blood**

**A. Respiratory Rate**

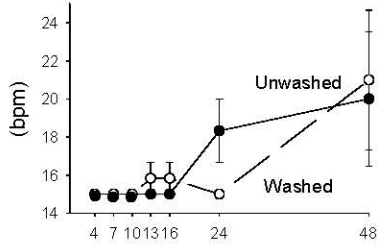

**B. AaO2 gradient**

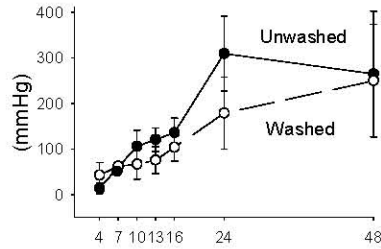

**C. Plateau Pressure**

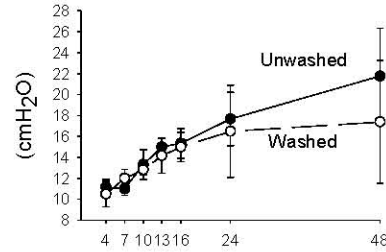

**D. SpO2**

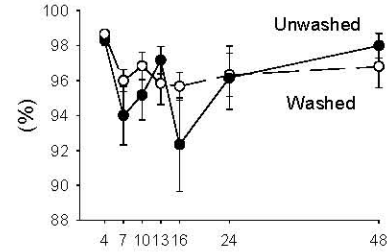

**E. Mean Pulmonary Artery Pressure**

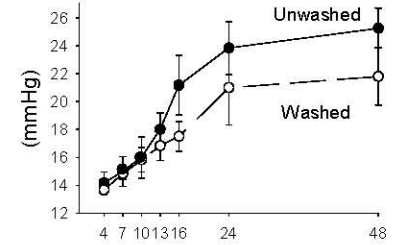

**7 day old stored blood**

**F. Respiratory Rate**

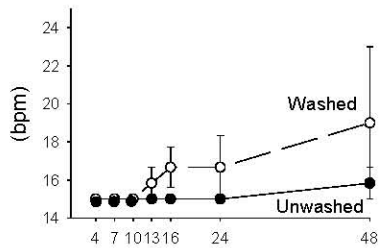

**G. AaO2 gradient**

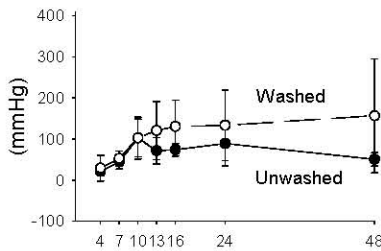

**H. Plateau Pressure**

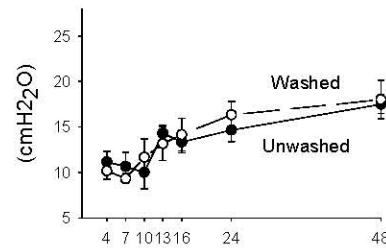

**I. SpO2**

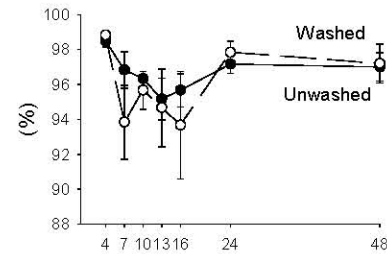

**J. Mean Pulmonary Artery Pressure**

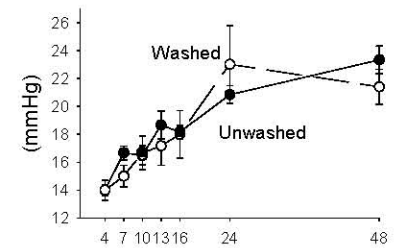

Time (hours) after *S. aureus* ( $1.5 \times 10^9$  CFU/kg) intrabronchial challenge

**42 day old stored blood**

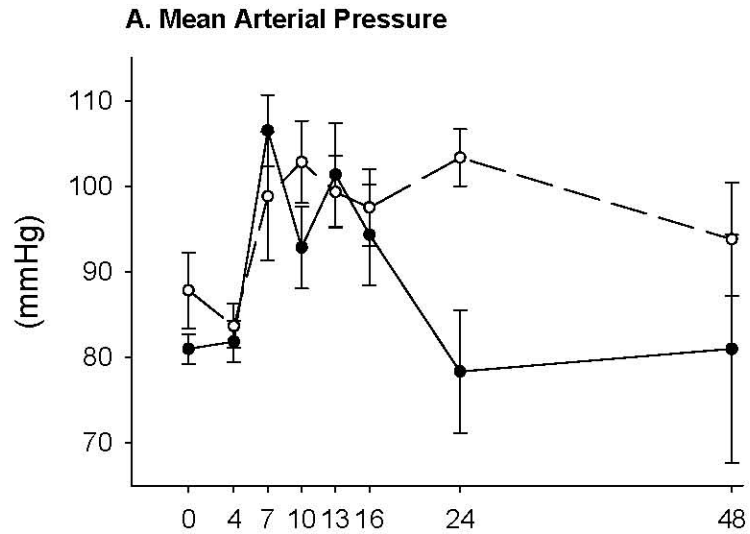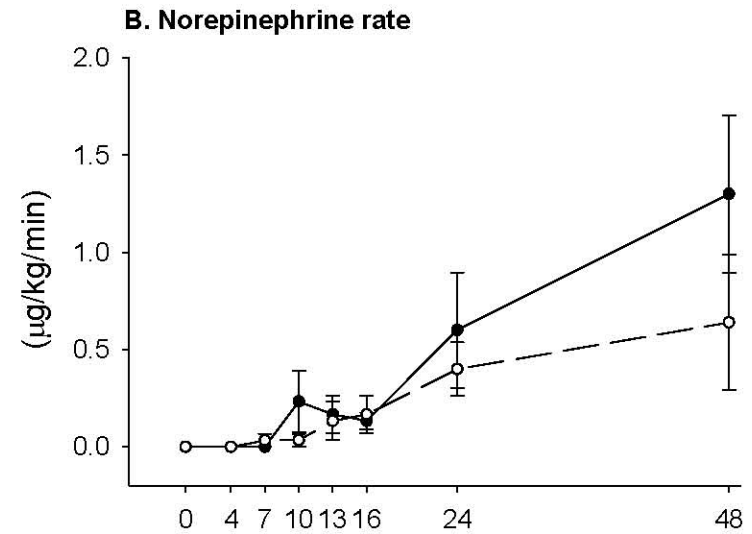

**7 day old stored blood**

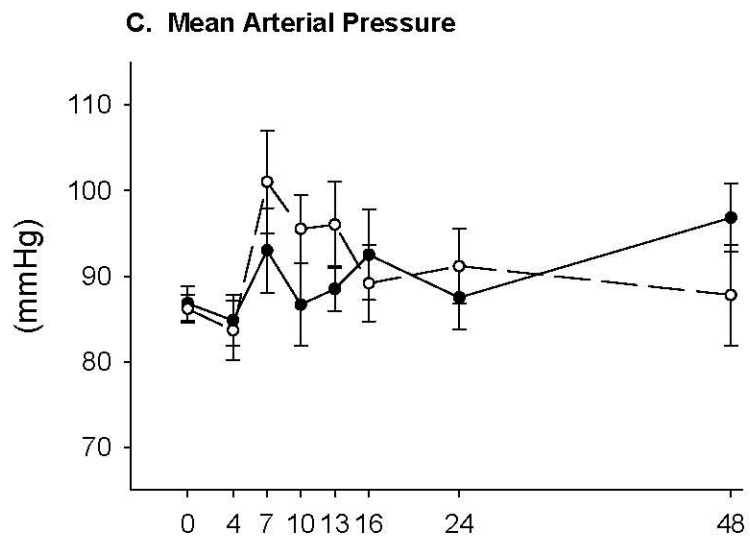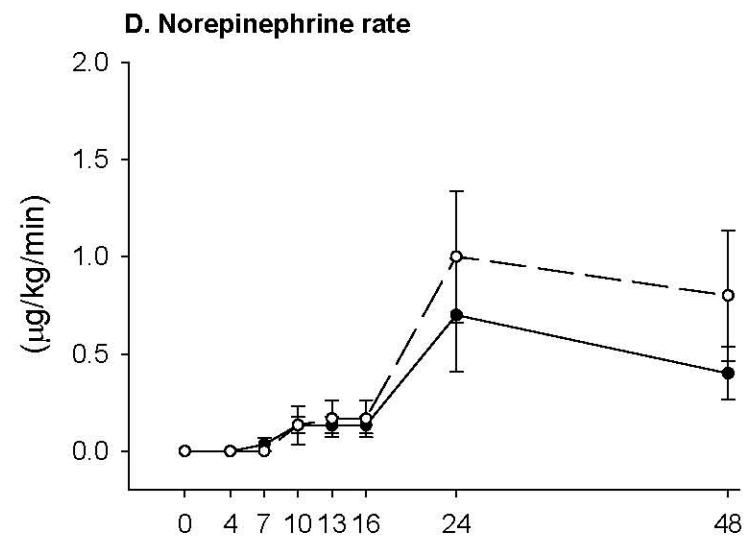

Time (hours) after *S. aureus* ( $1.5 \times 10^9$  CFU/kg) intrabronchial challenge



**A. ALT**

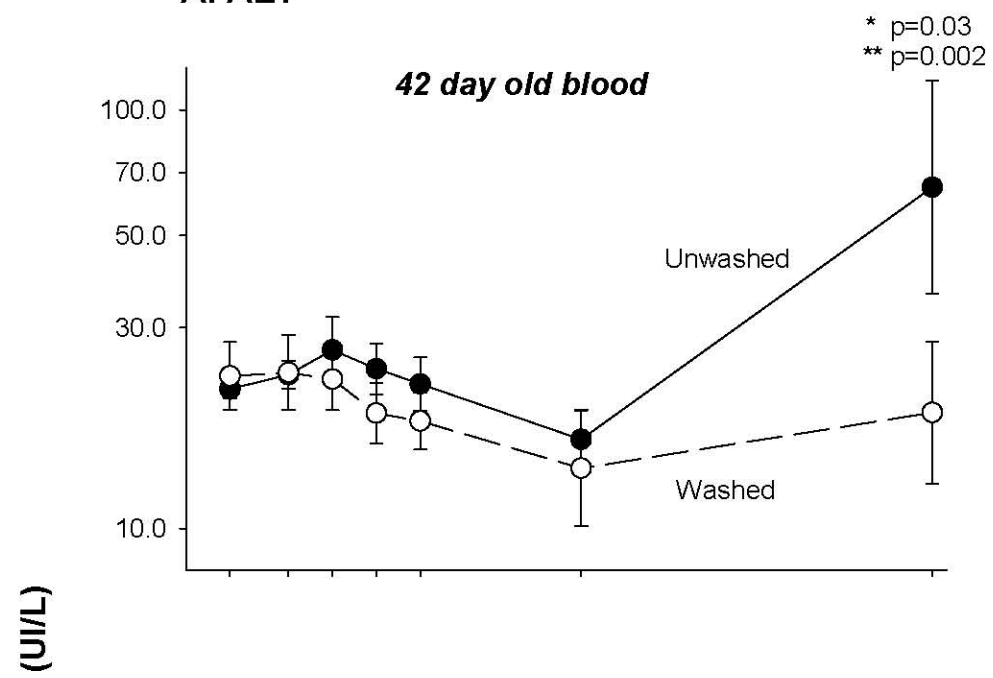

**B. Total Bilirubin**

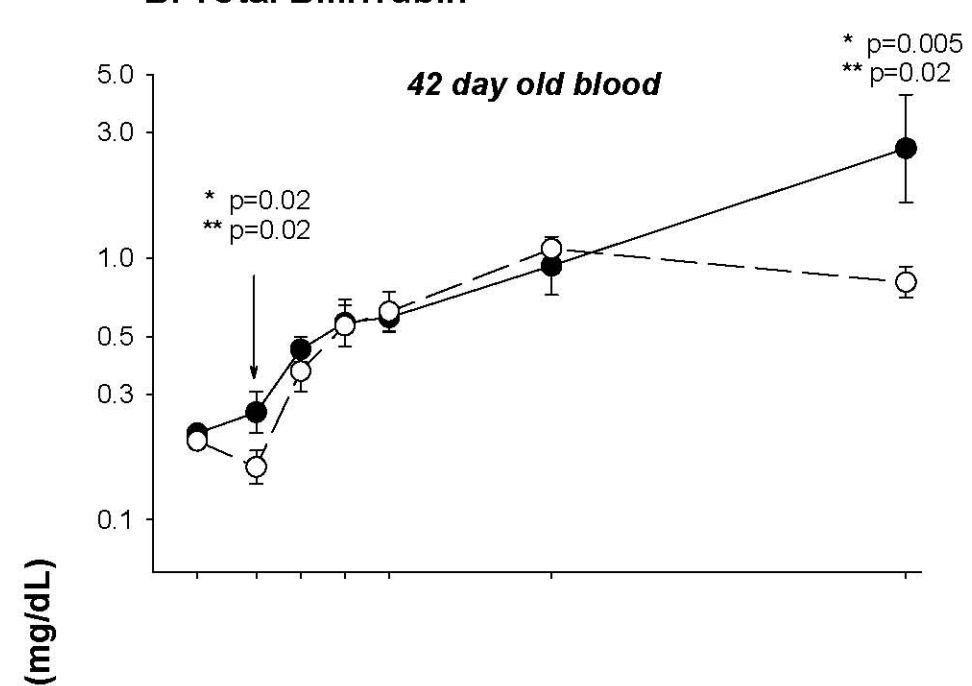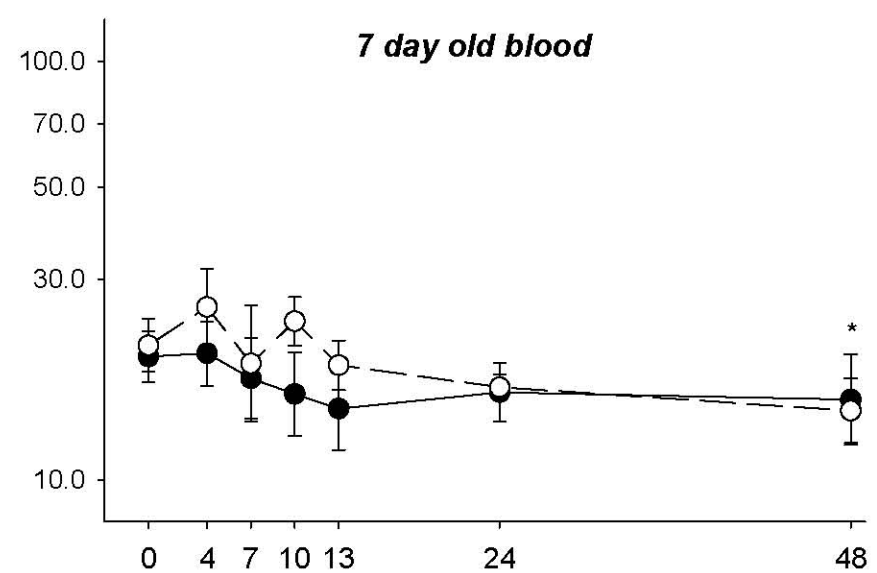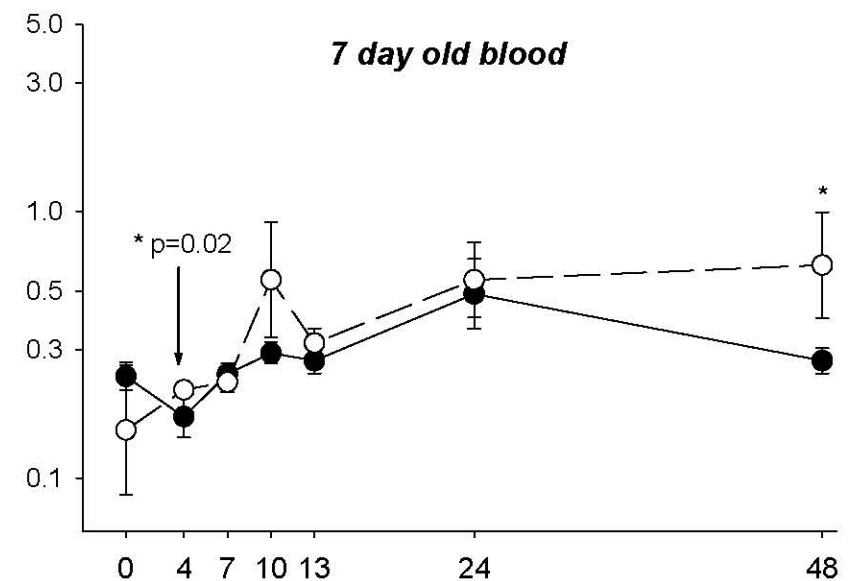

**Time (hours) after *S. aureus* ( $1.5 \times 10^9$  CFU/kg) intrabronchial challenge**

\* Qualitative Interaction; significantly different and opposite effect of washing older vs. fresher stored blood  
 \*\* Washed stored blood has a significantly different effect than unwashed stored blood

**A. 0 hours (before *S. aureus* intrabronchial challenge)**

| Parameter                    | Blood transfused |              |               |               |
|------------------------------|------------------|--------------|---------------|---------------|
|                              | [mean ( + SE)]   | Old Blood    | New Blood     | Washed Old    |
| <b>Blood Chemistry</b>       |                  |              |               |               |
| Na (mmol/L)                  | 145.6 (1.2)      | 147.5 (0.6)  | 148 (1.3)     | 146 (1.6)     |
| K (mmol/L)                   | 3.87 (0.13)      | 3.99 (0.17)  | 4.07 (0.07)   | 4.13 (0.17)   |
| Cl (mmol/L)                  | 120.2 (1.6)      | 120.2 (0.4)  | 121.3 (1.4)   | 121.1 (1.8)   |
| Glu (mg/dL)                  | 108.8 (10.8)     | 107.2 (6.7)  | 113.8 (10.0)  | 110.2 (4.9)   |
| Lac (mmol/L)                 | 0.94 (0.14)      | 1.58 (0.31)  | 1.30 (0.30)   | 1.26 (0.23)   |
| <b>Cellular Blood Counts</b> |                  |              |               |               |
| RBC ( $10^6/\mu\text{L}$ )   | 5.47 (0.32)      | 5.90 (0.45)  | 6.53 (0.47)   | 5.4 (0.21)    |
| Hb(g/dL)                     | 11.63 (0.5)      | 12.65 (0.9)  | 12.6 (1.0)    | 11.7 (0.48)   |
| Hematocrit (%)               | 39.35 (2.7)      | 42.8 (2.7)   | 46.9 (3.8)    | 40.1 (1.9)    |
| WBC                          | 5.58 (0.57)      | 6.43 (0.99)  | 5.02 (0.87)   | 5.52 (0.95)   |
| PLT ( $10^3/\mu\text{L}$ )   | 293.7 (32.8)     | 356.5 (31.9) | 379.5 (104.7) | 324.2 (24.2)  |
| <b>Proteins</b>              |                  |              |               |               |
| Total Proteins (g/dL)        | 4.4 (0.16)       | 4.9(0.19)    | 4.7 (0.17)    | 4.8 (0.16)    |
| Albumin (g/dL)               | 2.5 (0.08)       | 2.6 (0.09)   | 2.6 (0.14)    | 2.6 (0.14)    |
| CK (UI/L)                    | 623.8 (64.9)     | 613.5 (58.6) | 870.8 (116.5) | 744.7 (152.6) |

**B. 4 hours after *S. aureus* intrabronchial challenge**

| Parameter                    | Blood transfused |              |              |              |
|------------------------------|------------------|--------------|--------------|--------------|
|                              | [mean ( + SE)]   | Old Blood    | New Blood    | Washed Old   |
| <b>Blood Chemistry</b>       |                  |              |              |              |
| Na (mmol/L)                  | 144.9 (0.7)      | 147 (1.7)    | 146.7 (1.0)  | 147.7 (0.7)  |
| K (mmol/L)                   | 3.92 (0.15)      | 3.75 (0.14)  | 3.95 (0.07)  | 3.86 (0.07)  |
| Cl (mmol/L)                  | 121.4 (0.9)      | 121.3 (0.7)  | 121.6 (0.9)  | 122.1 (1.1)  |
| Glu (mg/dL)                  | 129 (14.4)       | 116.7 (8.4)  | 120.5 (7.0)  | 122.2 (5.8)  |
| Lac (mmol/L)                 | 1.30 (0.29)      | 1.30 (0.22)  | 1.13 (0.19)  | 1.08 (0.24)  |
| <b>Cellular Blood Counts</b> |                  |              |              |              |
| RBC ( $10^6/\mu\text{L}$ )   | 6.02 (0.47)      | 6.39 (0.58)  | 5.77 (0.36)  | 6.18 (0.17)  |
| Hb(g/dL)                     | 13.0 (1.1)       | 13.9 (1.1)   | 12.0 (0.7)   | 13.2 (0.4)   |
| Hematocrit (5)               | 43.7 (3.6)       | 46.9 (3.9)   | 41.5 (2.5)   | 46.6 (1.5)   |
| WBC                          | 4.72 (0.73)      | 4.9 (0.69)   | 4.39 (0.27)  | 5.25 (0.86)  |
| PLT ( $10^3/\mu\text{L}$ )   | 306.8 (26.1)     | 293.5 (21.1) | 278 (18.6)   | 335.2 (22.5) |
| <b>Proteins</b>              |                  |              |              |              |
| Total Proteins (g/dL)        | 4.2 (0.15)       | 4.6 (0.15)   | 4.4 (0.16)   | 4.6 (0.15)   |
| Albumin (g/dL)               | 2.3 (0.07)       | 2.5 (0.05)   | 2.4 (0.08)   | 2.5 (0.07)   |
| CK (UI/L)                    | 480 (75.9)       | 438.7 (36.9) | 655.7 (63.3) | 596.5 (98.1) |

**C. 24 hours after *S. aureus* intrabronchial challenge**

| Parameter                    | Blood transfused |               |               |             |
|------------------------------|------------------|---------------|---------------|-------------|
|                              | [mean ( + SE)]   | Old Blood     | New Blood     | Washed Old  |
| <b>Blood Chemistry</b>       |                  |               |               |             |
| Na (mmol/L)                  | 145.9 (1.5)      | 153.7 (4.5)   | 147.1 (2.3)   | 150.8 (1.8) |
| K (mmol/L)                   | 3.46 (0.18)      | 3.53 (0.24)   | 3.62 (0.25)   | 3.32 (0.18) |
| Cl (mmol/L)                  | 127.1 (1.7)      | 134.6 (4.5)   | 128.9 (2.2)   | 131.4 (2.4) |
| Glu (mg/dL)                  | 143.2 (8.0)      | 156.5 (7.5)   | 147.5 (7.4)   | 155.5 (5.4) |
| Lac (mmol/L)                 | 0.56 (0.05)      | 0.64 (0.07)   | 0.73 (0.06)   | 0.70 (0.14) |
| <b>Cellular Blood Counts</b> |                  |               |               |             |
| RBC ( $10^6/\mu\text{L}$ )   | 5.32 (0.28)      | 6.2 (0.54)    | 5.23 (0.44)   | 5.58 (0.35) |
| Hb(g/dL)                     | 11.0 (0.6)       | 12.3 (0.7)    | 10.7 (0.8)    | 11.4 (0.6)  |
| Hematocrit (5)               | 37.7 (2.0)       | 43.4 (4.0)    | 37.9 (3.4)    | 39.3 (1.9)  |
| WBC                          | 2.01 (0.65)      | 5.41 (1.63)   | 2.6 (0.52)    | 4.01 (0.99) |
| PLT ( $10^3/\mu\text{L}$ )   | 132.8 (11.7)     | 148.3 (11.3)  | 145.7 (11.3)  | 127.2 (9.3) |
| <b>Proteins</b>              |                  |               |               |             |
| Total Proteins (g/dL)        | 3.6 (0.23)       | 3.6 (0.22)    | 3.7 (0.14)    | 3.7 (0.13)  |
| Albumin (g/dL)               | 1.6 (0.11)       | 1.8 (0.1)     | 1.6 (0.04)    | 1.8 (0.08)  |
| CK (UI/L)                    | 582 (160.7)      | 533.3 (144.8) | 717.5 (144.7) | 356.3 (78)  |

**D. 48 hours after *S. aureus* intrabronchial challenge**

| Parameter                    | Blood transfused |               |              |              |
|------------------------------|------------------|---------------|--------------|--------------|
|                              | [mean ( + SE)]   | Old Blood     | New Blood    | Washed Old   |
| <b>Blood Chemistry</b>       |                  |               |              |              |
| Na (mmol/L)                  | 145.8 (2.6)      | 150.3 (3.4)   | 146.1 (2.3)  | 150.7 (4.4)  |
| K (mmol/L)                   | 3.37 (0.74)      | 3.45 (0.43)   | 3.33 (0.31)  | 3.21 (0.18)  |
| Cl (mmol/L)                  | 130.0 (2.8)      | 133.7 (4.0)   | 128.6 (2.1)  | 133.4 (4.0)  |
| Glu (mg/dL)                  | 139.2 (19.8)     | 153.3 (10.1)  | 154.2 (10.9) | 155.5 (5.4)  |
| Lac (mmol/L)                 | 0.67 (0.15)      | 0.48 (0.06)   | 0.47 (0.03)  | 0.67 (0.17)  |
| <b>Cellular Blood Counts</b> |                  |               |              |              |
| RBC ( $10^6/\mu\text{L}$ )   | 4.39 (0.32)      | 4.86 (0.39)   | 3.55 (0.25)  | 4.79 (0.41)  |
| Hb(g/dL)                     | 8.7 (0.5)        | 9.8 (0.88)    | 7.14 (0.48)  | 9.82 (1.02)  |
| Hematocrit (5)               | 30.8 (1.6)       | 34.22 (3.69)  | 25.0 (2.0)   | 33.5 (2.5)   |
| WBC                          | 4.96 (1.57)      | 4.82 (1.06)   | 3.5 (0.46)   | 4.32 (0.77)  |
| PLT ( $10^3/\mu\text{L}$ )   | 97.7 (7.9)       | 94.17 (6.27)  | 66.2 (7.4)   | 108.2 (15.7) |
| <b>Proteins</b>              |                  |               |              |              |
| Total Proteins (g/dL)        | 3.4 (0.25)       | 3.3 (0.14)    | 3.2 (0.17)   | 3.5 (0.29)   |
| Albumin (g/dL)               | 1.5 (0.08)       | 1.6 (0.6)     | 1.4 (0.06)   | 1.5 (0.13)   |
| CK (UI/L)                    | 610 (184.9)      | 343.8 (151.7) | 604.6 (53.7) | 105.2 (9.8)  |
